# Supplementary material
Source: publisher site journal article supplement (https://www.dovepress.com/article/607506)
Supplement: Supplementary file 1 [file 607506%20Revised%20Supplementary%20Table%201.doc]

**Supplementary Table 1.** Comparison of baseline characteristics between survivors and non-survivors.

| **Variables** | **Total**  **(n = 53)** | **Survivors (n = 17)** | **Non-survivors (n = 36)** | **p** | **statistic** |
| --- | --- | --- | --- | --- | --- |
| Baseline characteristics | | | | | |
| Age, Median (IQR) | 54.0 (46.0, 61.0) | 60.0 (50.0, 63.0) | 52.5 (44.0, 59.2) | 0.095 | 2.785 |
| Sex, n (%) |  |  |  | 1 | Fisher |
| Male | 42 (79.2) | 14 (82.4) | 28 (77.8) |  |  |
| Female | 11 (20.8) | 3 (17.6) | 8 (22.2) |  |  |
| Weight, Median (IQR) | 70.0 (60.0, 75.0) | 70.0 (55.0, 74.0) | 70.0 (61.5, 76.0) | 0.433 | 0.616 |
| Height, Median (IQR) | 170.0 (165.0, 174.0) | 170.0 (168.0, 175.0) | 170.0 (165.0, 173.0) | 0.716 | 0.132 |
| BMI, Median (IQR) | 24.2 (21.3, 25.4) | 22.9 (19.0, 24.8) | 24.5 (21.8, 25.5) | 0.135 | 2.24 |
| Los, Median (IQR) | 15.0 (10.0, 21.0) | 18.0 (16.0, 39.0) | 12.0 (8.0, 18.2) | 0.005 | 7.863 |
| SOFA-1 and SOFA-2 score | | | | | |
| SOFA score, Median (IQR) | 10.0 (7.0, 13.0) | 7.0 (6.0, 9.0) | 11.0 (7.8, 13.2) | 0.014 | 5.992 |
| Respirator subscore, Median (IQR) | 3.0 (3.0, 3.0) | 3.0 (3.0, 3.0) | 3.0 (3.0, 3.2) | 0.414 | 0.668 |
| Coagulation subscore, Median (IQR) | 1.0 (0.0, 2.0) | 1.0 (0.0, 2.0) | 1.0 (1.0, 2.2) | 0.212 | 1.559 |
| Cardiovascular subscore, Median (IQR) | 4.0 (0.0, 4.0) | 4.0 (0.0, 4.0) | 4.0 (0.0, 4.0) | 0.658 | 0.196 |
| Brain subscore, Median (IQR) | 2.0 (0.0, 4.0) | 0.0 (0.0, 2.0) | 3.0 (0.0, 4.0) | 0.049 | 3.878 |
| Kidney subscore, Median (IQR) | 1.0 (0.0, 2.0) | 0.0 (0.0, 1.0) | 1.0 (0.0, 2.0) | 0.115 | 2.486 |
| SOFA2, Median (IQR) | 14.0 (9.0, 17.0) | 9.0 (8.0, 14.0) | 16.0 (12.0, 18.0) | 0.003 | 8.951 |
| Brain subscore, Median (IQR) | 2.0 (0.0, 4.0) | 0.0 (0.0, 2.0) | 3.0 (0.0, 4.0) | 0.048 | 3.9 |
| Respirator subscore, Median (IQR) | 4.0 (4.0, 4.0) | 4.0 (4.0, 4.0) | 4.0 (4.0, 4.0) | 0.146 | 2.118 |
| Cardiovascular subscore, Median (IQR) | 4.0 (2.0, 4.0) | 4.0 (0.0, 4.0) | 4.0 (4.0, 4.0) | 0.085 | 2.959 |
| Liver subscore, Median (IQR) | 0.0 (0.0,1.0) | 0.0 (0.0, 1.0) | 1.0 (0.0, 1.0) | 0.06 | 3.548 |
| Kidney subscore, Median (IQR) | 4.0 (0.0, 4.0) | 1.0 (0.0, 4.0) | 4.0 (0.8, 4.0) | 0.052 | 3.765 |
| Coagulation subscore, Median (IQR) | 1.0 (0.0, 3.0) | 1.0 (0.0, 2.0) | 1.5 (1.0, 3.0) | 0.084 | 2.986 |
| Comorbidities | | | | | |
| Cardiac disease, n (%) |  |  |  | 0.667 | Fisher |
| 0 | 46 (86.8) | 14 (82.4) | 32 (88.9) |  |  |
| 1 | 7 (13.2) | 3 (17.6) | 4 (11.1) |  |  |
| MI, n (%) |  |  |  | 0.775 | 0.082 |
| 0 | 36 (67.9) | 12 (70.6) | 24 (66.7) |  |  |
| 1 | 17 (32.1) | 5 (29.4) | 12 (33.3) |  |  |
| COPD, n (%) |  |  |  | 0.321 | Fisher |
| 0 | 52 (98.1) | 16 (94.1) | 36 (100) |  |  |
| 1 | 1 (1.9) | 1 (5.9) | 0 (0) |  |  |
| IABP, n (%) |  |  |  | 0.651 | Fisher |
| 0 | 48 (90.6) | 15 (88.2) | 33 (91.7) |  |  |
| 1 | 5 (9.4) | 2 (11.8) | 3 (8.3) |  |  |
| Antiplatelet drugs, n (%) |  |  |  | 0.905 | Fisher |
| 0 | 33 (62.3) | 10 (58.8) | 23 (63.9) |  |  |
| 1 | 14 (26.4) | 5 (29.4) | 9 (25) |  |  |
| 2 | 6 (11.3) | 2 (11.8) | 4 (11.1) |  |  |
| Bleeding Event, n (%) |  |  |  | 0.658 | 0.196 |
| 0 | 32 (60.4) | 11 (64.7) | 21 (58.3) |  |  |
| 1 | 21 (39.6) | 6 (35.3) | 15 (41.7) |  |  |
| ECMO | | | | | |
| ECMO configuration, n (%) |  |  |  | 0.069 | Fisher |
| 1 | 23 (43.4) | 8 (47.1) | 15 (41.7) |  |  |
| 2 | 18 (34.0) | 7 (41.2) | 11 (30.6) |  |  |
| 3 | 9 (17.0) | 0 (0) | 9 (25) |  |  |
| 4 | 3 (5.7) | 2 (11.8) | 1 (2.8) |  |  |
| ECMO duration, Median (IQR) | 10.0 (5.0, 15.0) | 24.0 (9.0, 31.0) | 10.0 (4.8, 14.0) | 0.009 | 6.804 |
| Primary site of infection, n (%) |  |  |  | 1 | Fisher |
| 1 | 41 (77.4) | 13 (76.5) | 28 (77.8) |  |  |
| 2 | 9 (17.0) | 3 (17.6) | 6 (16.7) |  |  |
| 3 | 1 (1.9) | 0 (0) | 1 (2.8) |  |  |
| 4 | 2 (3.8) | 1 (5.9) | 1 (2.8) |  |  |
| Blood culture positive, n (%) |  |  |  | 1 | Fisher |
| 0 | 42 (79.2) | 14 (82.4) | 28 (77.8) |  |  |
| 1 | 11 (20.8) | 3 (17.6) | 8 (22.2) |  |  |
| Drug resistant bacteria, n (%) |  |  |  | 0.441 | 0.592 |
| 0 | 24 (45.3) | 9 (52.9) | 15 (41.7) |  |  |
| 1 | 29 (54.7) | 8 (47.1) | 21 (58.3) |  |  |
| Fungi positive, n (%) |  |  |  | 1 | Fisher |
| 0 | 47 (88.7) | 15 (88.2) | 32 (88.9) |  |  |
| 1 | 6 (11.3) | 2 (11.8) | 4 (11.1) |  |  |
| Time to onset of sepsis, Median (IQR) | 1.0 (0.0, 7.0) | 2.0 (0.0, 14.0) | 0.5 (0.0, 6.0) | 0.164 | 1.936 |
| Laboratory Tests | | | | | |
| WBC, Median (IQR) | 12.6 (8.4, 19.8) | 14.1 (10.3, 17.3) | 12.0 (7.3, 20.3) | 0.435 | 0.61 |
| N%, Median (IQR) | 85.5 (80.6, 91.1) | 83.5 (78.0, 90.9) | 86.4 (82.0, 91.3) | 0.331 | 0.945 |
| L%, Median (IQR) | 6.1 (3.3, 9.3) | 6.7 (3.4, 10.6) | 5.8 (3.2, 8.6) | 0.607 | 0.265 |
| HB, Median (IQR) | 90.0 (82.0, 112.0) | 106.0 (82.0, 112.0) | 89.5 (83.5, 107.0) | 0.517 | 0.42 |
| PLT, Median (IQR) | 122.0 (64.0, 172.0) | 152.0 (107.0, 202.0) | 103.5 (58.2, 142.5) | 0.094 | 2.813 |
| CRP, Median (IQR) | 86.3 (31.1, 138.5) | 84.0 (36.2, 115.7) | 88.6 (26.3, 172.3) | 0.539 | 0.378 |
| PCT, Median (IQR) | 1.8 (0.6, 11.2) | 1.7 (0.5, 8.1) | 3.0 (0.7, 11.0) | 0.284 | 1.148 |
| ALT, Median (IQR) | 119.0 (33.0, 286.0) | 53.0 (20.0, 229.0) | 147.5 (41.0, 298.0) | 0.355 | 0.854 |
| AST, Median (IQR) | 68.0 (32.0, 212.0) | 47.0 (29.0, 131.0) | 85.0 (34.2, 227.8) | 0.331 | 0.945 |
| TBI, Median (IQR) | 18.7 (11.5, 39.0) | 15.8 (12.2, 21.9) | 27.8 (11.1, 43.3) | 0.257 | 1.286 |
| Albumin, Median (IQR) | 31.2 (29.0, 37.8) | 31.2 (28.8, 38.1) | 31.0 (29.6, 37.4) | 0.782 | 0.076 |
| Cr, Median (IQR) | 126.0 (82.0, 212.0) | 117.0 (73.0, 135.0) | 143.0 (84.5, 226.2) | 0.137 | 2.21 |
| BUN, Median (IQR) | 10.6 (8.4, 17.9) | 10.4 (7.5, 12.2) | 12.2 (8.7, 21.6) | 0.086 | 2.941 |
| P/F, Median (IQR) | 299.0 (141.8, 459.0) | 239.0 (141.8, 433.3) | 321.0 (141.0, 489.0) | 0.819 | 0.052 |
| FiO2, Median (IQR) | 60.0 (50.0, 100.0) | 50.0 (40.0, 100.0) | 90.0 (50.0, 100.0) | 0.102 | 2.674 |
| PH, Median (IQR) | 7.3 (7.3, 7.4) | 7.4 (7.3, 7.5) | 7.3 (7.3, 7.4) | 0.365 | 0.821 |
| O2, Median (IQR) | 141.0 (69.9, 340.0) | 132.0 (85.1, 233.0) | 158.0 (68.2, 407.5) | 0.402 | 0.703 |
| CO2, Median (IQR) | 36.7 (34.0, 43.1) | 37.5 (35.0, 44.9) | 36.0 (33.3, 40.7) | 0.261 | 1.264 |
| BE, Median (IQR) | 1.6 (-5.8, 4.4) | 1.5 (0.4, 6.1) | 1.6 (-7.4, 3.6) | 0.319 | 0.994 |
| Lac, Median (IQR) | 3.0 (1.3, 6.1) | 1.9 (1.2, 4.7) | 4.0 (1.4, 6.5) | 0.083 | 3.01 |
| Na+, Median (IQR) | 142.0 (140.0, 146.0) | 143.0 (141.0, 145.0) | 142.0 (139.8, 146.0) | 0.311 | 1.026 |
| K+, Median (IQR) | 3.6 (3.3, 4.0) | 3.8 (3.7, 3.9) | 3.6 (3.3, 4.1) | 0.812 | 0.056 |
| Cl-, Median (IQR) | 106.0 (103.0, 110.0) | 106.0 (104.0, 108.0) | 106.0 (103.0, 110.2) | 0.864 | 0.03 |
| Ca2+, Median (IQR) | 1.1 (1.0, 1.1) | 1.1 (1.1, 1.1) | 1.1 (1.0, 1.2) | 0.417 | 0.658 |
| Reaction time, Median (IQR) | 7.2 (4.0, 12.2) | 5.8 (3.6, 9.6) | 8.7 (4.1, 17.6) | 0.364 | 0.823 |
| Kinetics time, Median (IQR) | 2.2 (1.3, 4.7) | 2.3 (1.1, 4.7) | 2.2 (1.5, 4.4) | 0.696 | 0.153 |
| Alpha angle, Median (IQR) | 66.0 (43.7, 74.2) | 66.8 (58.9, 76.7) | 63.2 (43.6, 71.3) | 0.469 | 0.524 |
| MA, Median (IQR) | 60.5 (51.2, 66.7) | 61.3 (53.9, 69.5) | 60.4 (47.9, 64.7) | 0.542 | 0.372 |
| EPL, Median (IQR) | 0.0 (0.0, 1.7) | 0.6 (0.0, 2.0) | 0.0 (0.0, 1.4) | 0.556 | 0.346 |
| LY30, Median (IQR) | 0.0 (0.0, 1.8) | 0.6 (0.0, 2.7) | 0.0 (0.0, 1.7) | 0.502 | 0.45 |
| INR, Median (IQR) | 1.3 (1.2, 1.5) | 1.2 (1.2, 1.5) | 1.4 (1.2, 1.6) | 0.463 | 0.538 |
| FiB, Median (IQR) | 3.2 (2.2, 4.7) | 3.6 (2.2, 4.5) | 3.2 (2.2, 4.9) | 0.871 | 0.026 |
| APTT, Median (IQR) | 51.9 (35.4, 62.4) | 47.3 (35.4, 55.8) | 53.0 (36.9, 68.9) | 0.341 | 0.908 |
| TT, Median (IQR) | 23.8 (18.1, 117.3) | 23.6 (19.5, 136.8) | 23.8 (18.0, 53.5) | 0.666 | 0.186 |
| PT, Median (IQR) | 15.4 (13.7, 17.4) | 14.5 (13.8, 17.4) | 15.7 (13.7, 17.8) | 0.548 | 0.36 |
| D2, Median (IQR) | 8101.0 (3713.0, 19694.0) | 7611.0 (5931.0, 10843.0) | 8231.5 (3650.5, 19977.8) | 0.901 | 0.015 |
| AT-Ⅲ, Median (IQR) | 58.8 (48.1, 72.1) | 71.3 (65.0, 85.2) | 54.9 (44.5, 63.3) | 0.008 | 7.117 |
| PLT, Median (IQR) | 96.0 (52.0, 153.0) | 138.0 (96.0, 209.0) | 78.0 (41.8, 125.0) | 0.058 | 3.596 |
| Reaction time-24h, Median (IQR) | 10.0 (6.1, 14.6) | 9.3 (5.5, 13.2) | 10.3 (6.7, 15.3) | 0.215 | 1.535 |
| Kinetics time-24h, Median (IQR) | 4.0 (1.9, 5.8) | 3.2 (1.6, 5.6) | 4.1 (2.7, 6.0) | 0.282 | 1.16 |
| Alpha angle-24h, Median (IQR) | 56.6 (43.2, 66.2) | 59.6 (35.8, 70.7) | 56.6 (48.2, 63.2) | 0.864 | 0.029 |
| Maximum Amplitude-24h, Median (IQR) | 60.6 (51.2, 66.2) | 61.8 (53.9, 72.1) | 60.0 (42.8, 64.9) | 0.123 | 2.382 |
| EPL-24h, Median (IQR) | 0.0 (0.0, 1.3) | 0.0 (0.0, 1.1) | 0.0 (0.0, 1.5) | 0.617 | 0.25 |
| LY30-24h, Median (IQR) | 0.0 (0.0, 1.1) | 0.0 (0.0, 0.9) | 0.0 (0.0, 1.2) | 0.574 | 0.317 |
| INR-24h, Median (IQR) | 1.3 (1.1, 1.5) | 1.2 (1.0, 1.3) | 1.4 (1.3, 1.6) | 0.007 | 7.326 |
| FiB-24h, Median (IQR) | 3.9 (2.6, 4.8) | 3.8 (2.6, 4.4) | 3.9 (2.7, 5.0) | 0.732 | 0.118 |
| APTT-24h, Median (IQR) | 49.0 (38.3, 61.9) | 48.7 (36.9, 53.0) | 51.4 (42.1, 65.7) | 0.249 | 1.329 |
| TT-24h, Median (IQR) | 27.6 (18.5, 87.2) | 45.3 (22.7, 136.4) | 24.9 (17.5, 47.6) | 0.065 | 3.412 |
| PT-24h, Median (IQR) | 15.2 (13.6, 17.7) | 13.8 (12.6, 15.2) | 15.8 (14.5, 18.8) | 0.008 | 7.021 |
| D2-24h, Median (IQR) | 8007.0 (3036.0, 16326.0) | 7221.0 (4085.0, 15855.0) | 8106.5 (3006.0, 16428.5) | 0.879 | 0.023 |
| AT-Ⅲ-24h, Median (IQR) | 0.6 (0.5, 0.6) | 0.6 (0.6, 0.7) | 0.5 (0.5, 0.6) | 0.029 | 4.761 |
| PLT-24h, Median (IQR) | 94.0 (44.0, 143.0) | 117.0 (83.0, 152.0) | 73.5 (31.5, 116.8) | 0.022 | 5.274 |

Cardiac disease dilated cardiomyopathy and valvular heart disease;

ECMO configuration: VA (veno-arterial) ECMO: 1; VV (veno-venous) ECMO: 2; ECPR (extracorporeal cardiopulmonary resuscitation): 3; Hybrid ECMO configuration: 4;

Primary site of infection: Pulmonary: 1; Bloodstream: 2; Gastrointestinal: 3; Urinary tract: 4;

BMI: Body Mass Index; LOS: Length of Stay; SOFA: Sequential Organ Failure Assessment; MI: Myocardial Infarction; COPD: Chronic Obstructive Pulmonary Disease; IABP: Intra-Aortic Balloon Pump; WBC: White Blood Cell count; N%: Neutrophil percentage; L%: Lymphocyte percentage; HB: Hemoglobin; PLT: Platelet count; CRP: C-Reactive Protein; PCT: Procalcitonin; ALT: Alanine Aminotransferase; AST: Aspartate Aminotransferase; TBI: Total Bilirubin; Cr: Creatinine; BUN: Blood Urea Nitrogen; P/F: PaO₂/FiO₂ ratio; FiO2: Fraction of Inspired Oxygen; PH: Potential of Hydrogen; BE: Base Excess; Lac: Lactate; Na+: Sodium ion; K+: Potassium ion; Cl-: Chloride ion; Ca2+: Calcium ion; ESP: Estimated Percent Lysis; LY30: Lysis at 30 minutes; INR: International Normalized Ratio; FiB: Fibrinogen; APTT: Activated Partial Thromboplastin Time; TT: Thrombin Time; PT: Prothrombin Time; D2: D-dimer; AT-III: Antithrombin III.
